# Supplementary material for: Synthesis and properties of new 9,10-anthraquinone derived compounds for molecular electronics
Source: Royal Society of Chemistry journal article supplement (doi:10.1039/c2nj40772h), 2012-11-28
Supplement: c2nj40772h.pdf [file c2nj40772h.pdf]

## Supplementary Material

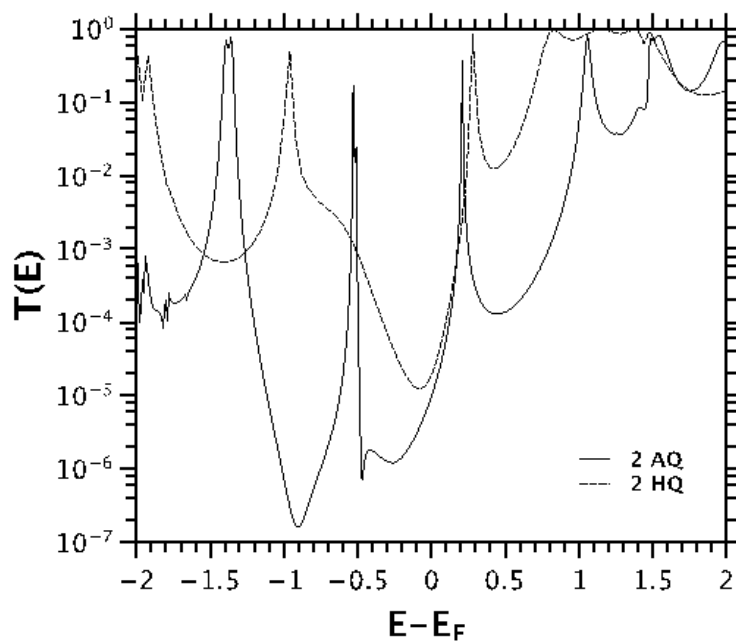

**Fig S1:** Comparison of the DFT non-equilibrium Greens function (NEGF) formalism calculated energy dependent transmission coefficients for **2** of the anthraquinone (AQ) and hydroquinone (HQ) modification of **2**.

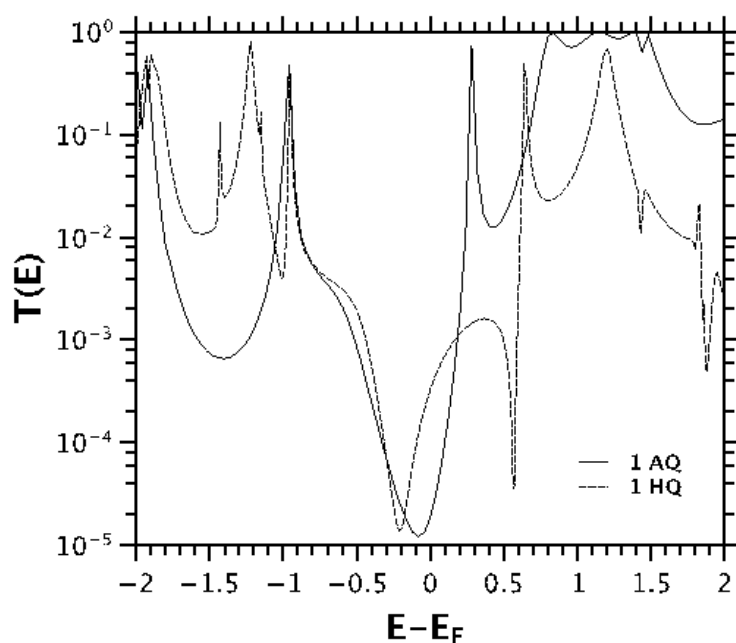

**Fig S2:** Comparison of the DFT non-equilibrium Greens function (NEGF) formalism calculated energy dependent transmission coefficients for **1** of the anthraquinone (AQ) and hydroquinone (HQ) modification of **1**.
